# Supplementary material for: Boosting electrocatalytic oxygen evolution over Prussian blue analog/transition metal dichalcogenide nanoboxes by photo-induced electron transfer
Source: Royal Society of Chemistry journal article supplement (doi:10.1039/c9ta09310a), 2019-01-01
Supplement: c9ta09310a1.pdf [file c9ta09310a1.pdf]

**Supporting Information for**  
**Boosting Electrocatalytic Oxygen Evolution over Prussian Blue**  
**Analogs/Transition Metal Dichalcogenides Nanoboxes by Photo-**  
**Induced Electron Transfer**

Hui Xu, Hongyuan Shang, Liujun Jin, Chunyan Chen, Cheng Wang and Yukou Du\*

*<sup>a</sup> College of Chemistry, Chemical Engineering and Materials Science, Soochow  
University, Suzhou 215123, PR China*

*<sup>b</sup> School of Environmental Science and Engineering, Shaanxi University of Science  
and Technology, Xian 710021, PR China*

*\* Corresponding authors: Tel: 86-512-65880089, Fax: 86-512-65880089;*

*E-mail:); wangchuanyi@sust.edu.cn (C. Wang); duyk@suda.edu.cn (Y. Du)*

## Experimental details

**Synthesis of ZIF-67 nanocubes:** The ZIF-67 nanocubes were synthesized according to a reference with a few modifications (Chem 2016, 1, 102-113). In a typical synthesis, 58.3 mg of  $\text{Co}(\text{NO}_3)_2 \cdot 6\text{H}_2\text{O}$  was dissolved in 2 mL of deionized water containing 1 mg of cetyltrimethylammonium bromide (CTAB). Then this solution was rapidly injected into 15 mL of aqueous solution containing 908 mg of 2-methylimidazole and stirred at room temperature for 20 min. The product was collected by centrifugation and washed by ethanol for several times.

**Synthesis of ZIF-67@CoFe PBA nanocubes:** 22 mg of ZIF-67 nanocubes was dispersed in 15 mL of ethanol by ultrasound. At the same time, 100 mg of  $\text{K}_3[\text{Fe}(\text{CN})_6]$  was dissolved in 5 mL of  $\text{H}_2\text{O}$  to form a transparent solution. Then the  $\text{K}_3[\text{Fe}(\text{CN})_6]$  aqueous solution was injected into the ZIF-67 solution rapidly with continuous stirring at room temperature for at least 3 h. Then, the product was collected by centrifugation and washed with water and ethanol three times.

**Synthesis of  $\text{CoS}_2$  nanoboxes:** 22 mg of ZIF-67 nanocubes was dispersed in 15 mL of ethanol by ultrasound. At the same time, 100 mg of thioacetamide (TAA) was dissolved in 5 mL of ethanol, and then injected into the ZIF-67 solution rapidly. The mixture was further heated at 90 °C for 12 min. Finally, the product was collected by centrifugation and washed with water and ethanol three times.

**Synthesis of CoFe PBA/ $\text{CoS}_2$  nanoboxes:** The freshly prepared CoFe PBA nanocubes were dissolved into 15 mL of ethanol by ultrasound. Then, 5 mL of solution that dissolved with 100 mg of TAA was injected into above solution to form a homogeneous solution. After that, the mixture was then heated at 90 °C for 12 min. Finally, the product was collected by centrifugation and washed with water and ethanol three times. The CoFe PBA/ $\text{CoS}_2$  nanoboxes with different atomic ratios could be obtained by tuning the reaction times. For comparison, CoFe PBA/ $\text{CoS}_2$ -6 and CoFe PBA/ $\text{CoS}_2$ -30 were also prepared by changing the sulfurization time to 6 and 30 min, respectively, while keeping other conditions the same.

**Synthesis of CoFe (II) PBA/ $\text{CoS}_2$  nanoboxes:** The synthesis of CoFe (II) PBA/ $\text{CoS}_2$

nanoboxes was similar to that of CoFe PBA/CoS<sub>2</sub> nanoboxes just substituting the K<sub>3</sub>[Fe(CN)<sub>6</sub>] with K<sub>4</sub>[Fe(CN)<sub>6</sub>] while keeping other reaction condition the same.

**Materials characterizations:** UV–vis adsorption spectroscopic characterization was performed using Nanodrop-2000C spectrophotometer (Thermo Fisher Scientific Inc). The morphologies of each sample were characterized by transmission electron microscopy (TEM, JEM-2100, Japan) by drying a droplet of sample solutions on Cu-grids with carbon film. Scanning electron microscopic (SEM) images were acquired on silicon wafers by S-4800 (Japan). XPS spectra were obtained on a PHI 5000 VersaProbe (Japan). The binding energy was calibrated by means of the C 1s peak energy of 284.6 eV. X-ray diffraction (XRD) patterns were collected on a D8 Advance X-ray diffractometer (Bruker, Germany) with Cu K $\alpha$  ( $\lambda = 1.54 \text{ \AA}$ ) radiation at a low scanning speed of 0.2° per min. UV/Visible diffuse reflectance spectra (UV-DRS) of the powders were obtained for the dry pressed disk samples using a UV-3600 Plus Spectrophotometer (SHIMAZU, Japan).

**OER Electrochemical tests:** All electrochemical measurements were carried out using a CHI 760E instrument (Chen hua, China) at 25 °C. A working electrode was made by dropcasting 10  $\mu\text{L}$  of the catalyst to cover a glassy carbon electrode (3 mm diameter). A graphite rod was used as the counter electrode and an Ag/AgCl electrode was used as the reference. All the measured potentials were converted to reversible hydrogen electrodes (RHE) according to Potential = E Ag/AgCl + 0.059 pH + 0.197. The electrolyte was 1 M KOH dissolved in water. LSV was recorded with the scan rates of 5 mV/s with and without light irradiation (150 W). The overpotential ( $\eta$ ) was calculated according to the following formula:  $\eta = E_{\text{RHE}} - 1.23 \text{ V}$ . Linear sweep voltammetry (LSV) was recorded in 1.0 M KOH solution at a scan rate of 5 mV s<sup>-1</sup> to obtain the polarization curves. I-t curves were recorded at 1.6 V (vs RHE) with light on and off in the presence of 1M KOH. Tafel plots are recorded with the linear portions at low overpotential fitted to the Tafel equation ( $\eta = b \log j + a$ , where  $\eta$  is overpotential,  $j$  is the current density, and  $b$  is the Tafel slope). Electrochemical impedance spectroscopy (EIS) was recorded under the following conditions: amplitude 5 mV, frequency ranging from 100 to 0.1 Hz, and open circuit. Mott-

Schottky plots were derived from impedance-potential tests conducted at a frequency of 1000 Hz with light on and off. The current density was normalized to the geometrical area. All the electrochemical data were presented without  $iR$  correction. Cyclic voltammetry (CV) taken with various scan rates (10, 50, 100, 200 and 300  $\text{mV s}^{-1}$ ) in the presence of 1.0 M KOH has been collected in -0.05-0.05 V (vs. Ag/AgCl) and used to estimate the double-layer capacitance.

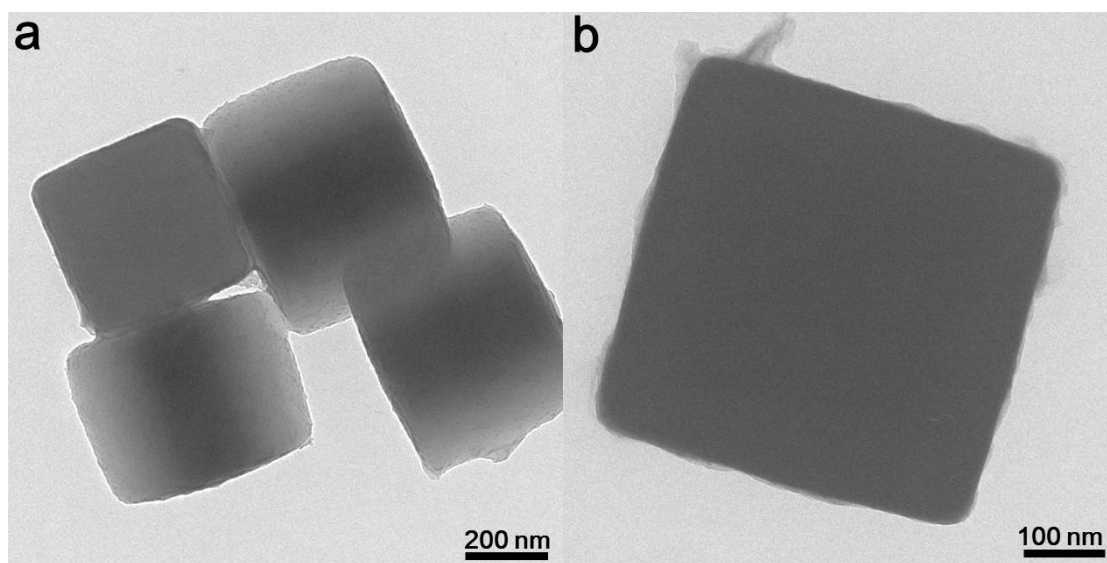

**Figure S1** Representative TEM images of ZIF-67 nanocubes with different magnifications.

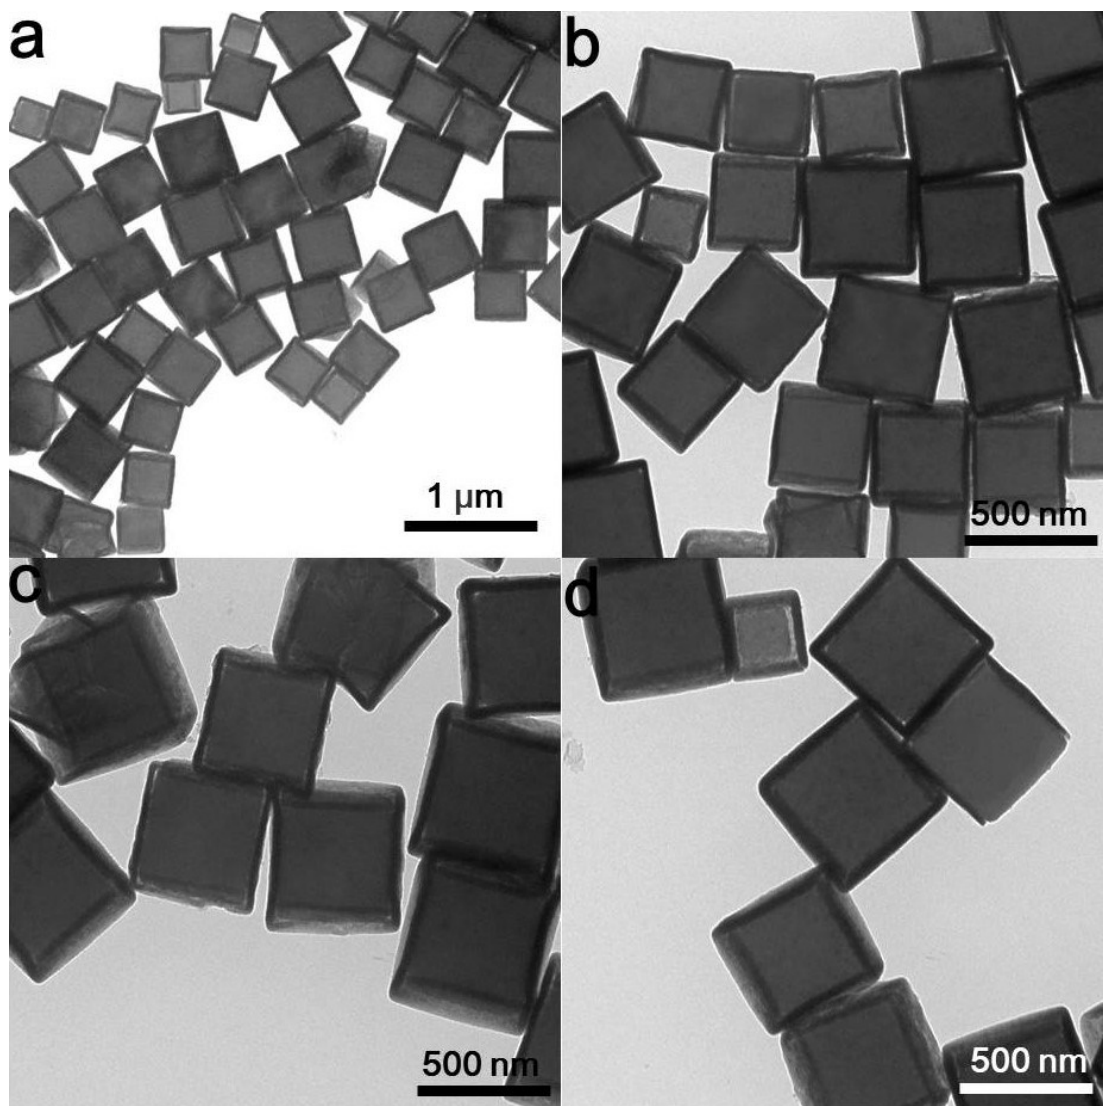

**Figure S2** Representative TEM images of CoFe PBA cubes prepared by adding 50 mg of  $K_3[Fe(CN)_6]$  for keeping reacting for 3h.

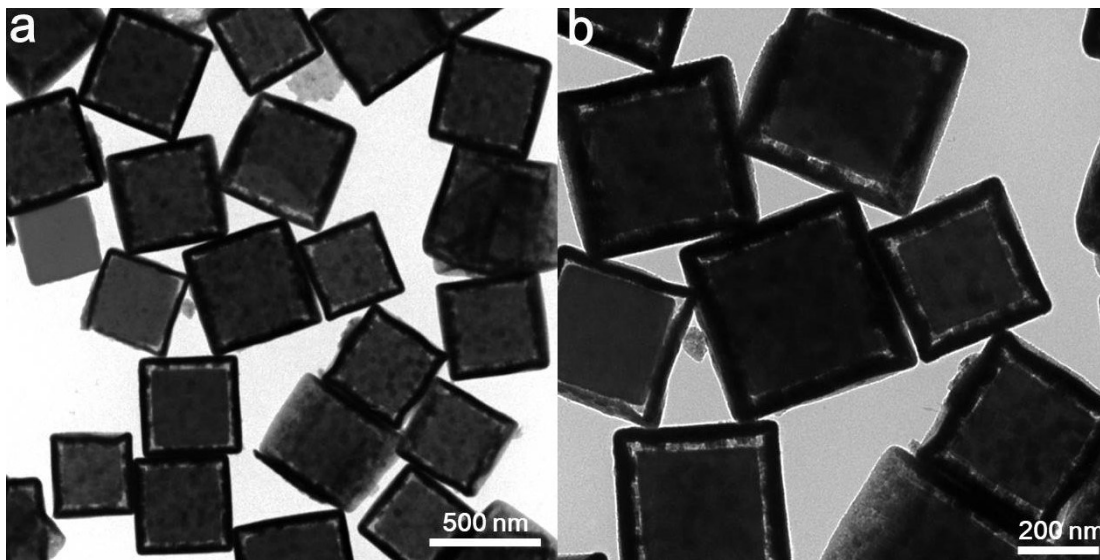

**Figure S3** Representative TEM images of CoFe PBA cubes prepared by adding 100 mg of  $K_3[Fe(CN)_6]$  for keeping reacting for 4 h.

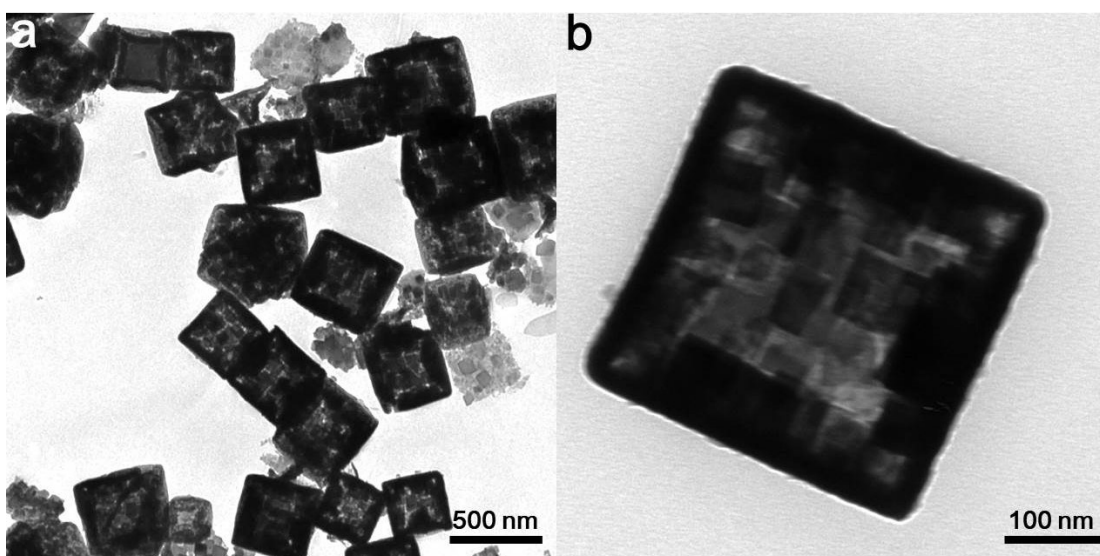

**Figure S4** Representative TEM images of CoFe PBA cubes prepared by adding 100 mg of  $K_3[Fe(CN)_6]$  for keeping reacting for 12 h.

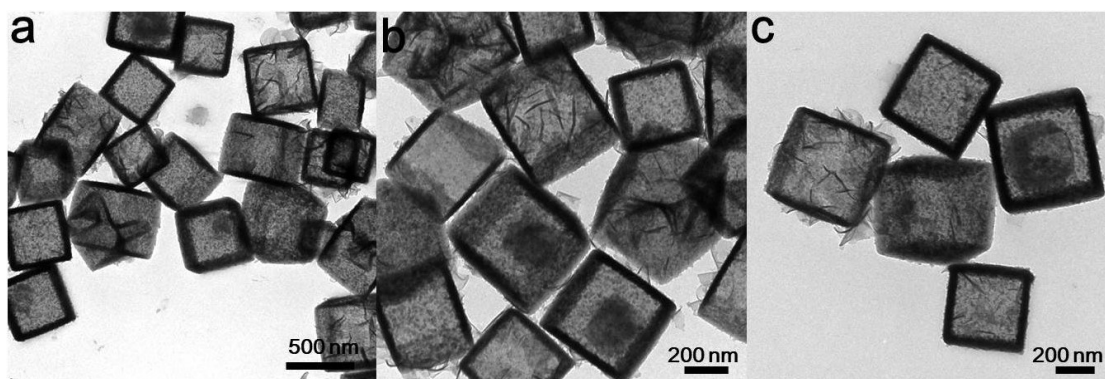

**Figure S5** Representative TEM images of CoFe hydroxides prepared by hydrolyzing CoFe PBA.

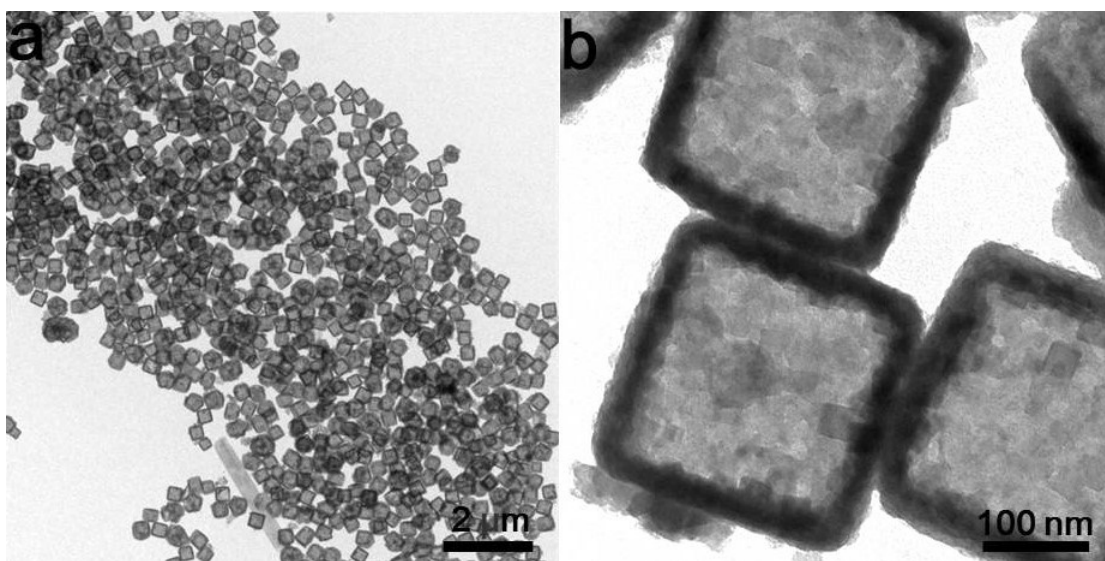

**Figure S6** Additional TEM images of CoFe PBA/CoS<sub>2</sub>-12 CNBs with different magnifications.



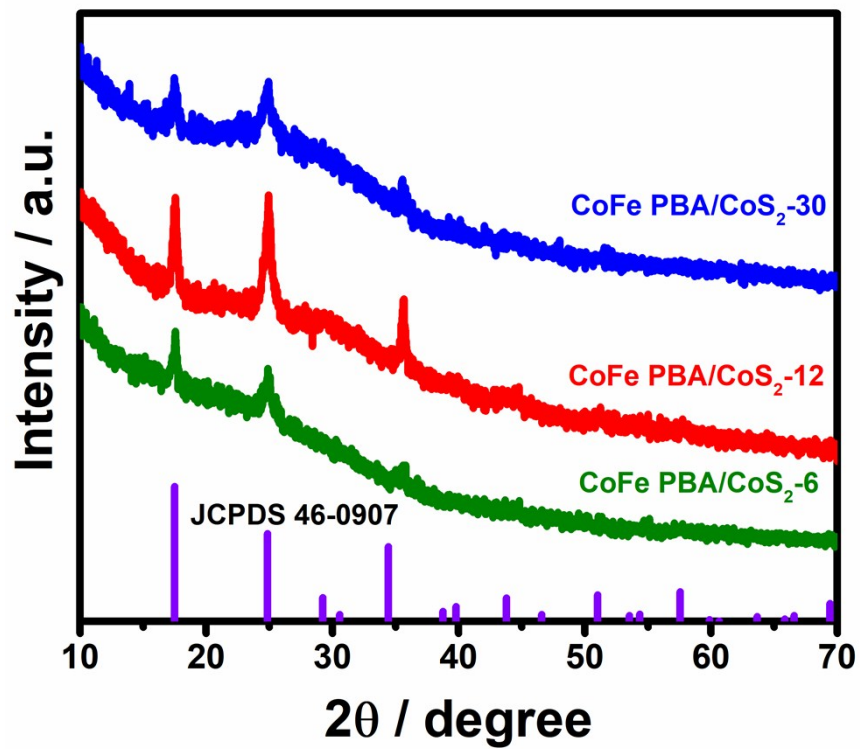

**Figure S7** XRD patterns of CoFe PBA/CoS<sub>2</sub>-6 CNBs, CoFe PBA/CoS<sub>2</sub>-12 CNBs, and CoFe PBA/CoS<sub>2</sub>-30 CNBs.

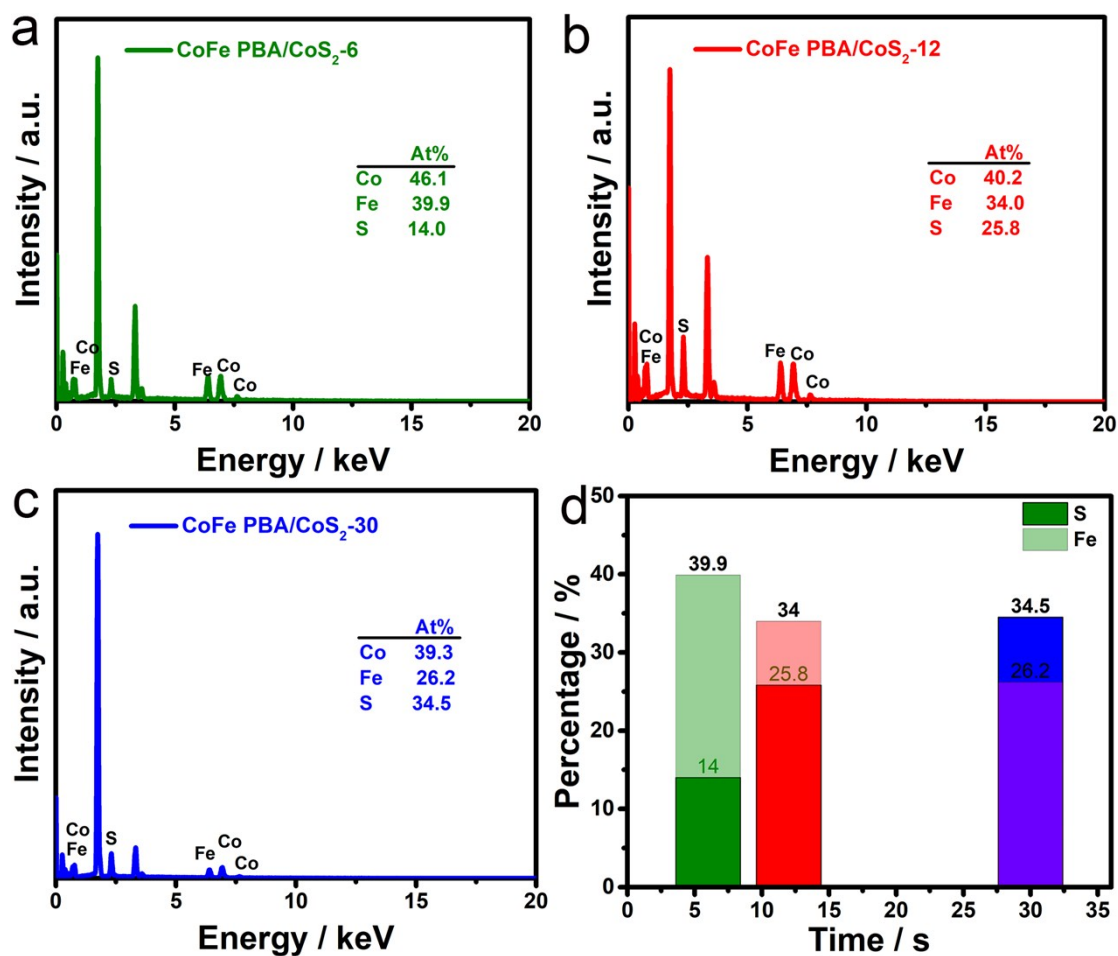

**Figure S8** SEM-EDS spectra of (a) CoFe PBA/CoS<sub>2</sub>-6 CNBs, (b) CoFe PBA/CoS<sub>2</sub>-12 CNBs, and (c) CoFe PBA/CoS<sub>2</sub>-30 CNBs. (d) The histogram for the percentage of Fe and S element in the CoFe PBA/CoS<sub>2</sub> over sulfurization time.

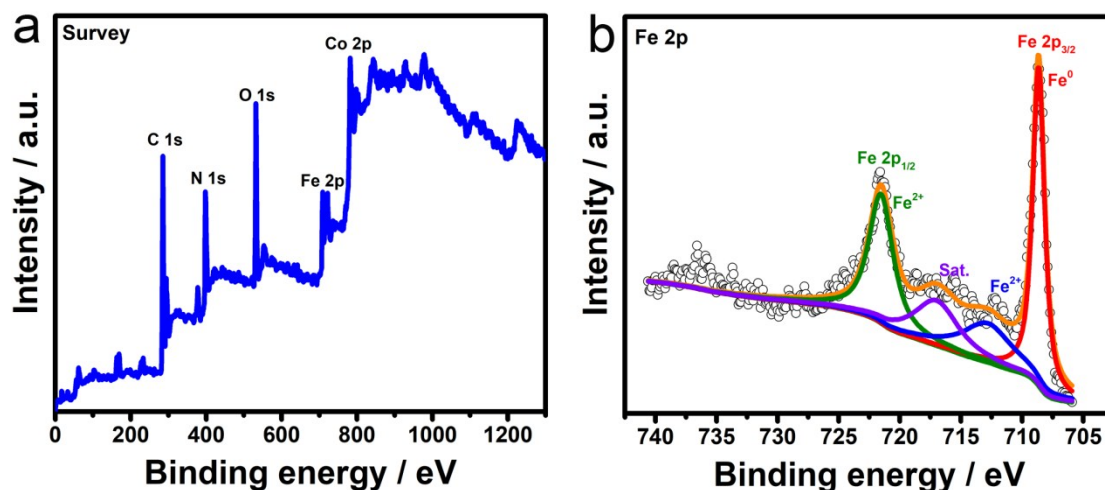

**Figure S9** (a) XPS survey scan and (b) detailed Fe 2p XPS spectrum of CoFe PBA.

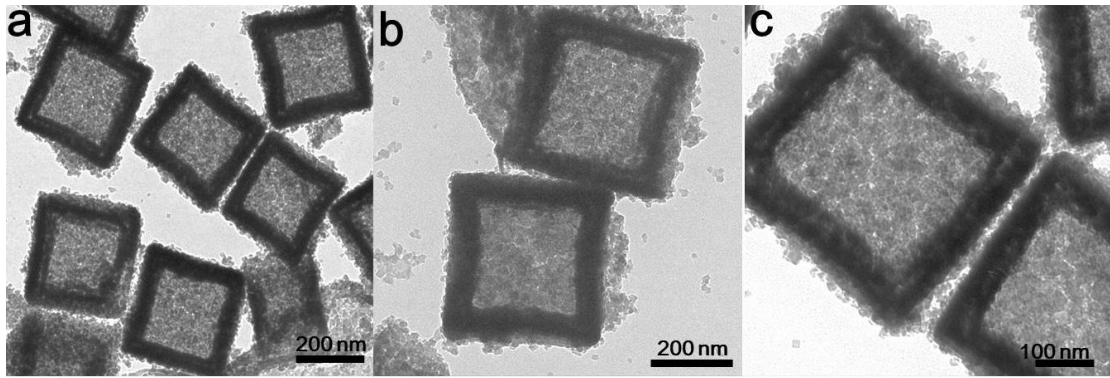

**Figure S10** Representative TEM images of CoFe PBA/CoS<sub>2</sub>-6 CNCs with different magnifications.

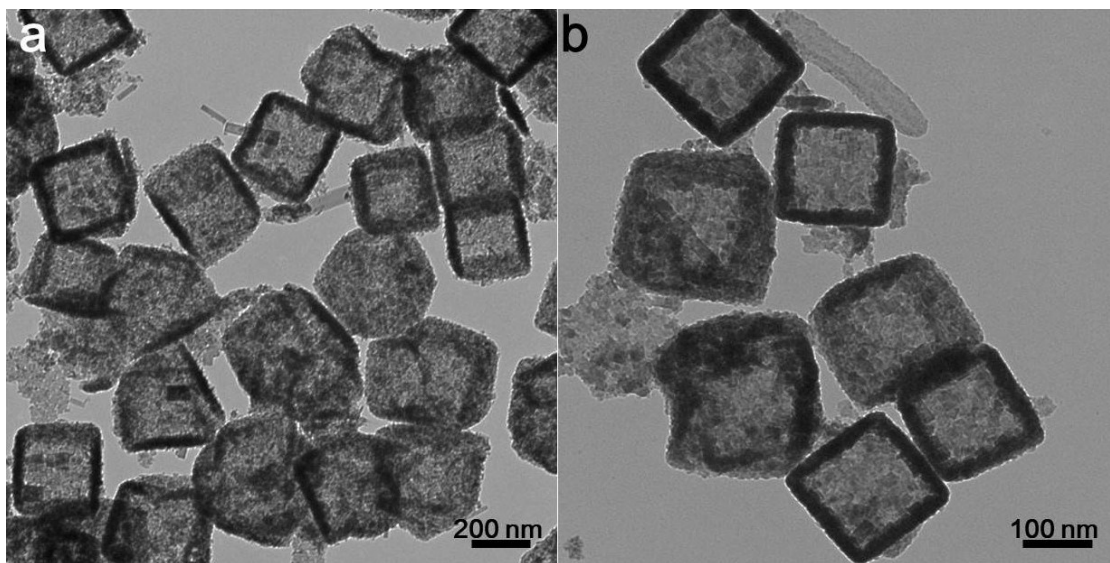

**Figure S11** Representative TEM images of CoFe PBA/CoS<sub>2</sub>-30 CNBs with different magnifications.

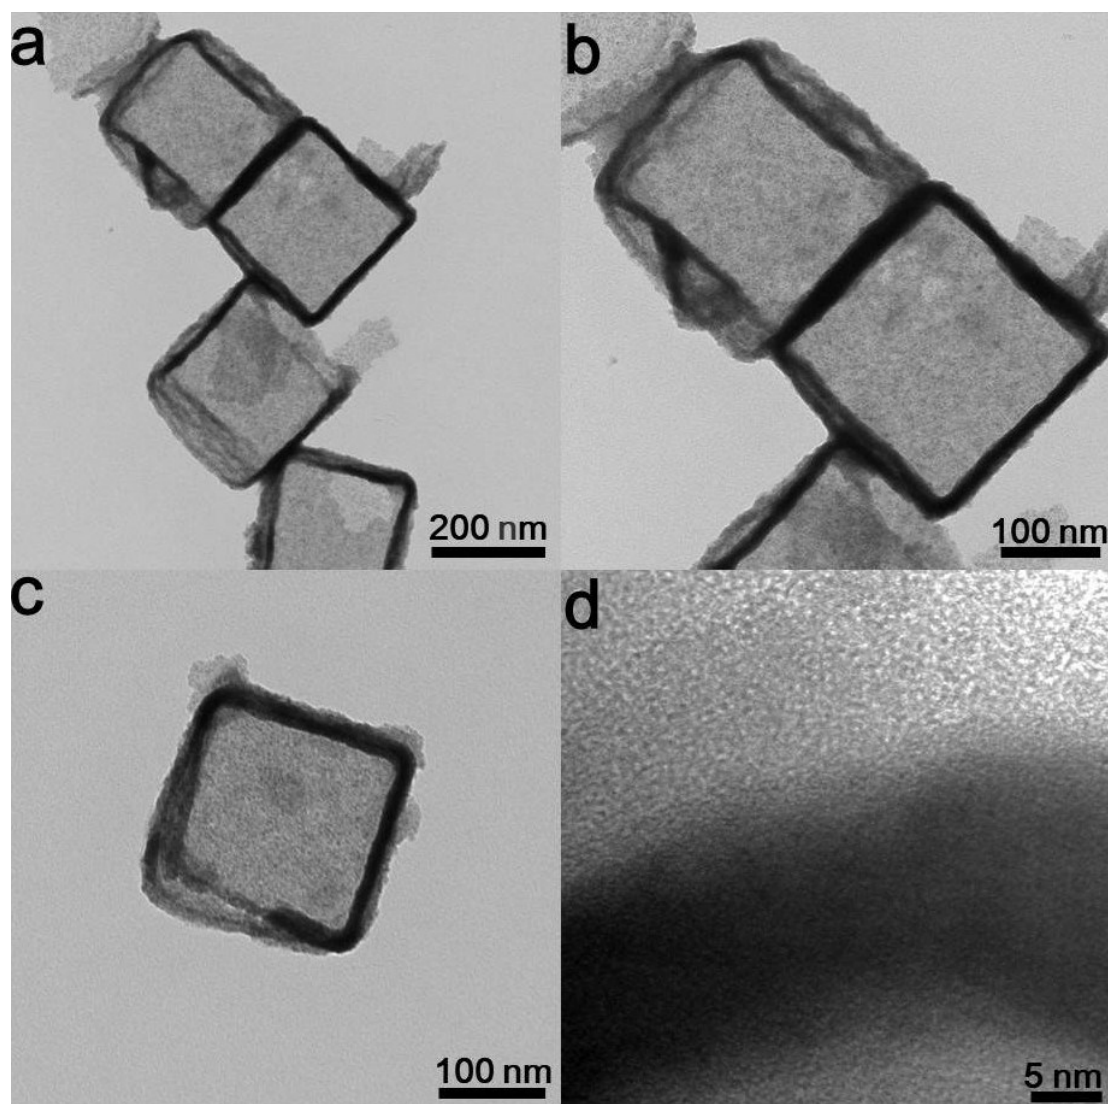

**Figure S12** Representative TEM images of CoS<sub>2</sub> nanoboxes with different magnifications.

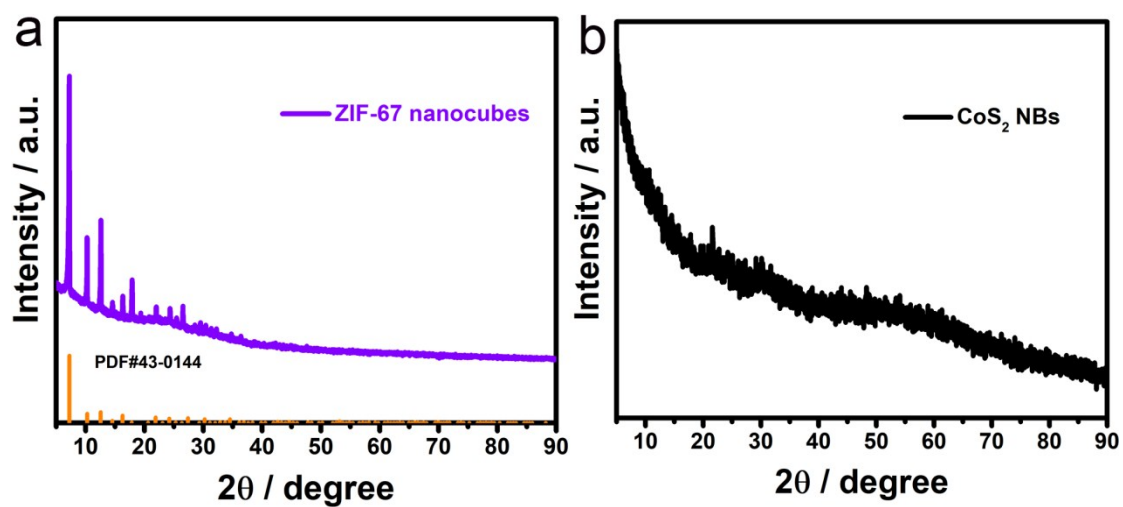

**Figure S13** XRD patterns of (a) ZIF-67 nanocubes and (b) CoS<sub>2</sub> nanoboxes.

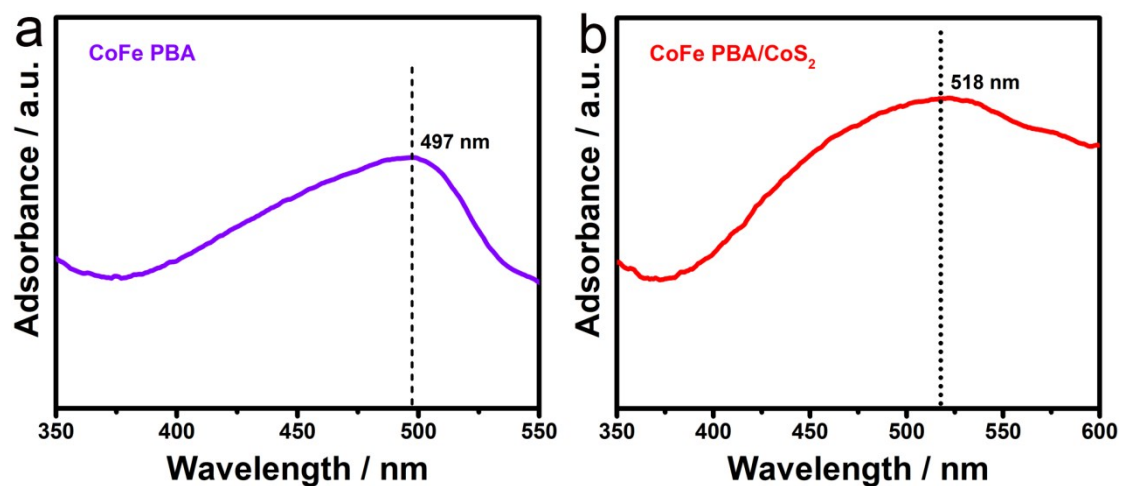

Figure S14 UV-vis spectra of (a) CoFe PBA and (b) CoFe PBA/CoS<sub>2</sub> CNBs.

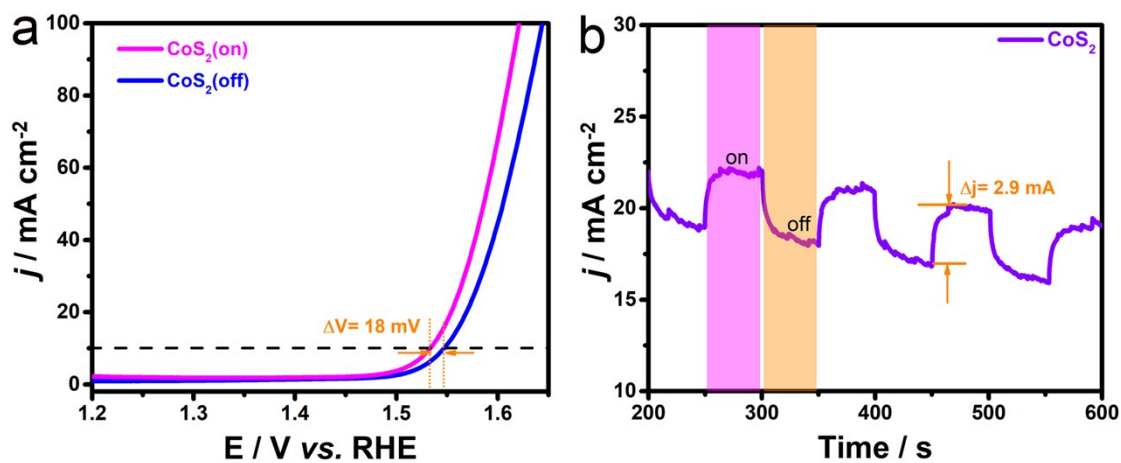

Figure S15 (a) LSV polarization curves and (b) I-t curve of CoS<sub>2</sub> nanoboxes in the absence or presence of light irradiation (potential=1.6 V).

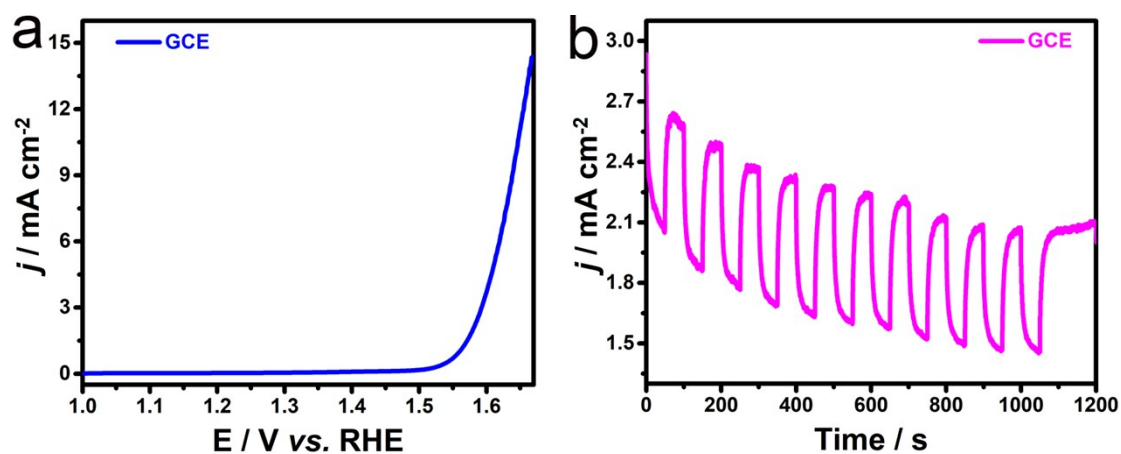

Figure 16 (a) LSV polarization curves of and (b) I-t curve of pure GCE in the absence or presence of light irradiation (potential=1.6 V).

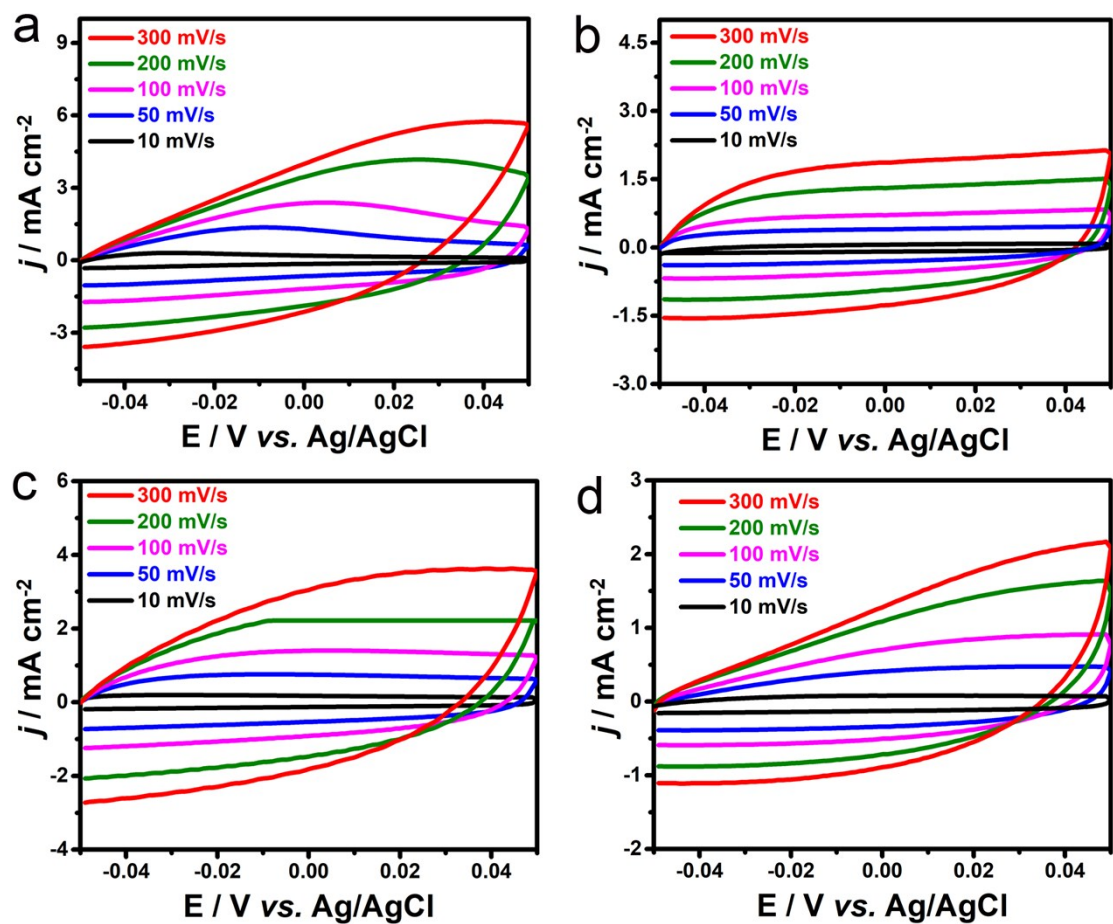

**Figure S17** CV curves of (a) CoFe PBA, (b) CoFe PBA/CoS<sub>2</sub>-6 CNBs, (c) CoFe PBA/CoS<sub>2</sub>-12 CNBs, and (d) CoFe PBA/CoS<sub>2</sub>-30 CNBs in 1 M KOH solution with different scan rates.

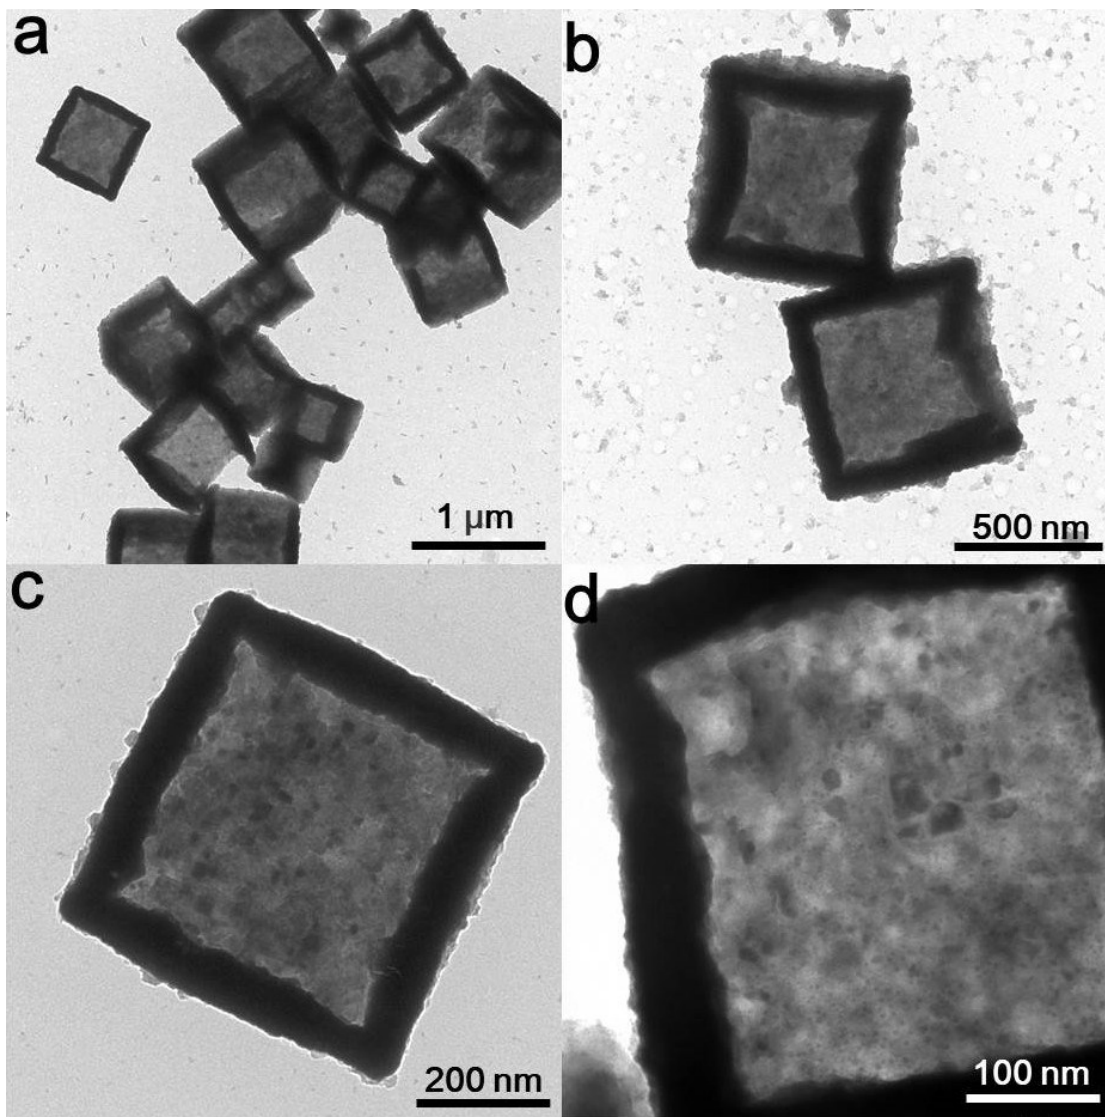

**Figure S18** Representative TEM images of CoFe(II) PBA/CoS<sub>2</sub> CNBs with different magnifications.

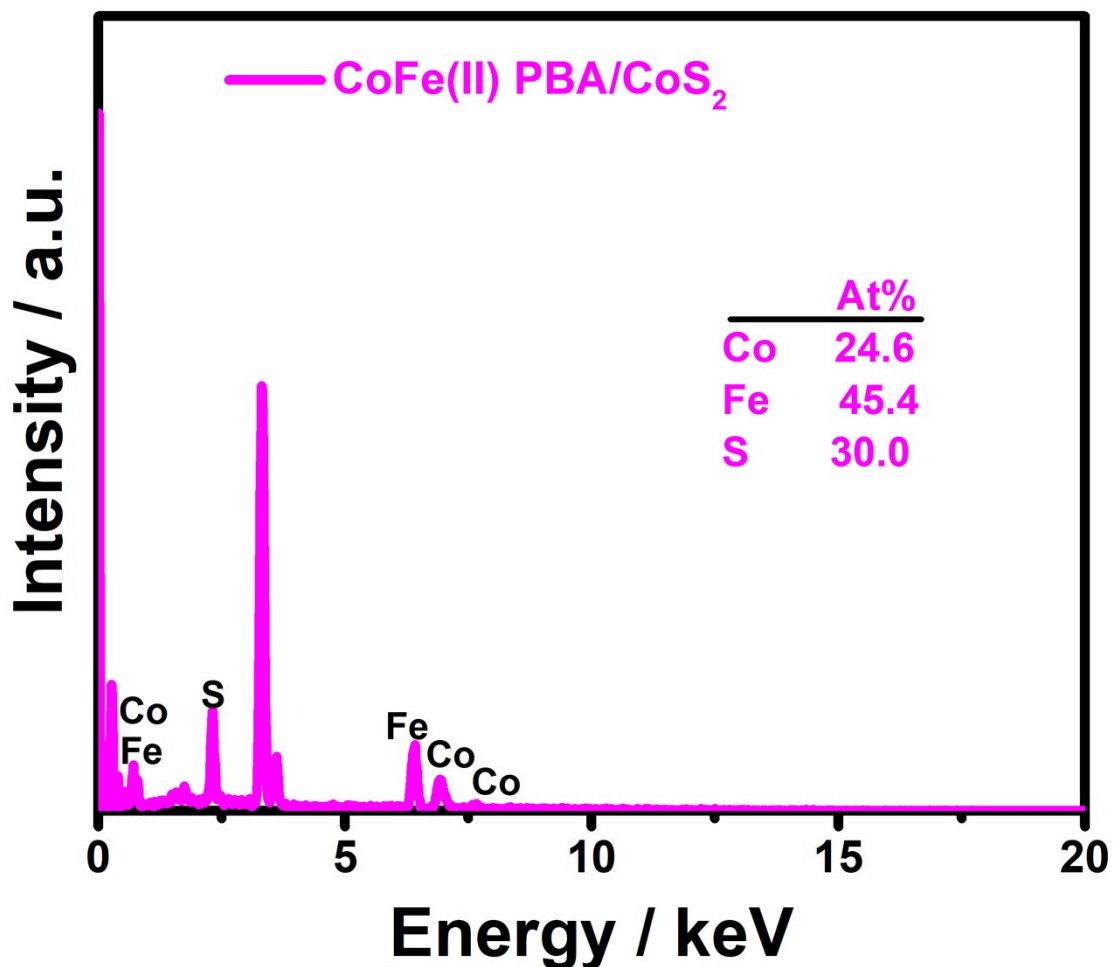

Figure S19 SEM-EDS spectrum of CoFe(II) PBA/CoS<sub>2</sub> CNBs.

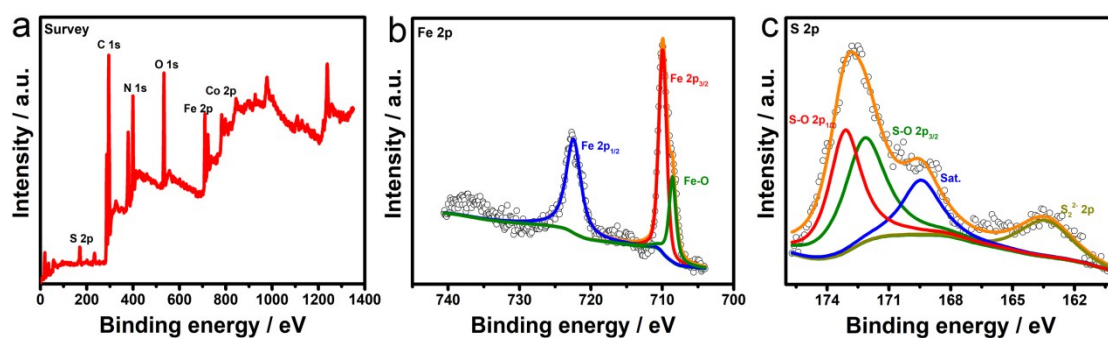

Figure S20 (a) XPS survey scan and (b) detailed Fe 2p, (c) S 2p XPS spectra of CoFe(II) PBA/CoS<sub>2</sub> CNBs.



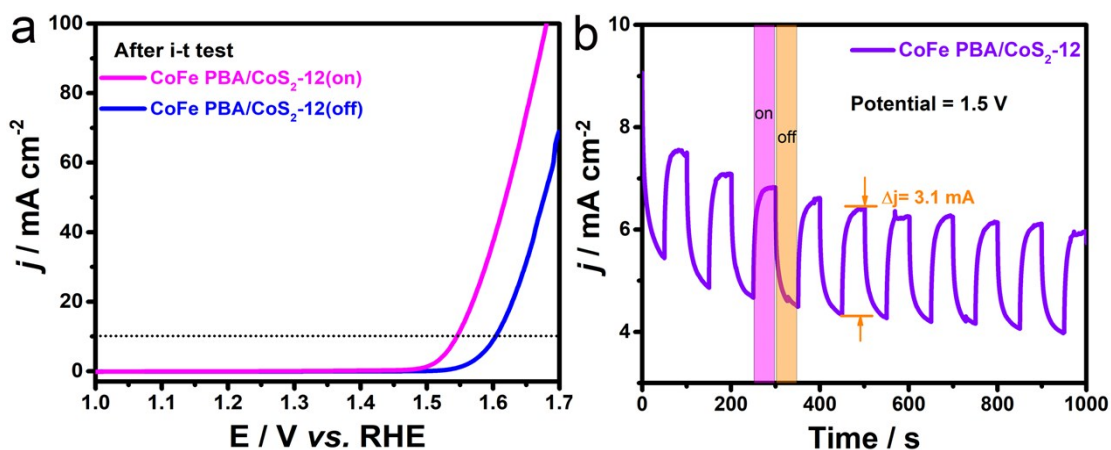

**Figure S21** (a) LSV polarization curves of and (b) I-t curve of CoFe PBA/CoS<sub>2</sub> nanoboxes in the absence or presence of light irradiation (potential=1.5 V).

Based on LSV polarization curves CoFe PBA/CoS<sub>2</sub> nanoboxes in the absence or presence of light irradiation after the long-term I-t test, it is clearly observed that the the OER activity of CoFe PBA/CoS<sub>2</sub> CNBs is significantly improved (Figure S21), presenting a much lower overpotential and much higher current increase rate than that under dark. Specifically, the overpotential of CoFe PBA/CoS<sub>2</sub> CNBs at 10 mA cm<sup>-2</sup> related to that under dark is negatively shifted by more than 50 mV, further confirming the excellent photoelectrocatalytic OER activity and long-term stability. Moreover, I-t curve of CoFe PBA/CoS<sub>2</sub> nanoboxes at the potential of 1.5 V was also performed to study their photo-induced current effect. As seen, the CoFe PBA/CoS<sub>2</sub> CNBs displayed the prompt current responses to on-off irradiation cycles with a  $\Delta j$  of 3.1 mA cm<sup>-2</sup> at 1.5 V, further confirming the excellent photoelectrocatalytic activity at low potential.
